# Supplementary material
Source: PubMed Central journal article supplement (PMC6727346)
Supplement: jp9b02317_si_001.pdf [file jp9b02317_si_001.pdf]

## Supporting Information

### Proton Translocation via Tautomerization of Asn298 During the S<sub>2</sub>–S<sub>3</sub> State Transition in the Oxygen-Evolving Complex of Photosystem II

Maria Chrysina,<sup>a,b</sup> Juliana Cecília de Mendonça Silva,<sup>b,c</sup> Georgia Zahariou,<sup>a</sup> Dimitrios A. Pantazis,<sup>c\*</sup> Nikolaos Ioannidis<sup>a\*</sup>

<sup>a</sup> Institute of Nanoscience & Nanotechnology, NCSR “Demokritos”, Athens 15310, Greece.

<sup>b</sup> Max-Planck-Institut für Chemische Energiekonversion, Stiftstr. 34–36, 45470 Mülheim an der Ruhr, Germany

<sup>c</sup> Max-Planck-Institut für Kohlenforschung, Kaiser-Wilhelm-Platz 1, 45470 Mülheim an der Ruhr, Germany

\*Corresponding authors, Nikolaos Ioannidis, tel: +302106503344, fax: +302106519430, e-mail address: n.ioannidis@inn.demokritos.gr

Dimitrios A. Pantazis, Tel. +49(0)208 306 2156, Fax. +49(0)208 306 2989

email: dimitrios.pantazis@kofo.mpg.de

| Temperature (K) | Rate constant $k$ ( $s^{-1}$ ) | Driving force $-\Delta G^0$ (meV) |
|-----------------|--------------------------------|-----------------------------------|
|                 |                                |                                   |
| 212             | 0.00333                        | 1219                              |
| 212             | 0.00356                        | 1216                              |
| 193             | 0.00406                        | 1208                              |
| 188             | 0.00408                        | 1208                              |
| 150             | 0.00490                        | 1197                              |
| 148             | 0.00535                        | 1192                              |
| 123             | 0.00524                        | 1193                              |
| 123             | 0.00629                        | 1182                              |
| 77              | 0.00658                        | 1179                              |
| 77              | 0.00714                        | 1174                              |

Table S1. Data extracted from charge recombination kinetics of the  $S_2Y_z^*$  with  $Q_A^{\bullet-}$  at 10K. Driving forces were calculated using the Hopfield expression,

$k_{et} = (2\pi/\hbar)H_{AB}^2 \times [1/(2\lambda\pi\hbar\omega \coth(\hbar\omega/2k_B T))]^{1/2} \exp[-(\Delta G^0 + \lambda)2/2\lambda\hbar\omega \coth(\hbar\omega/2k_B T)]$ , with  $\hbar\omega=70$  meV,  $H_{AB}=7.6 \times 10^{-6}$  meV,  $\lambda=550$  meV and  $T=10$  K.

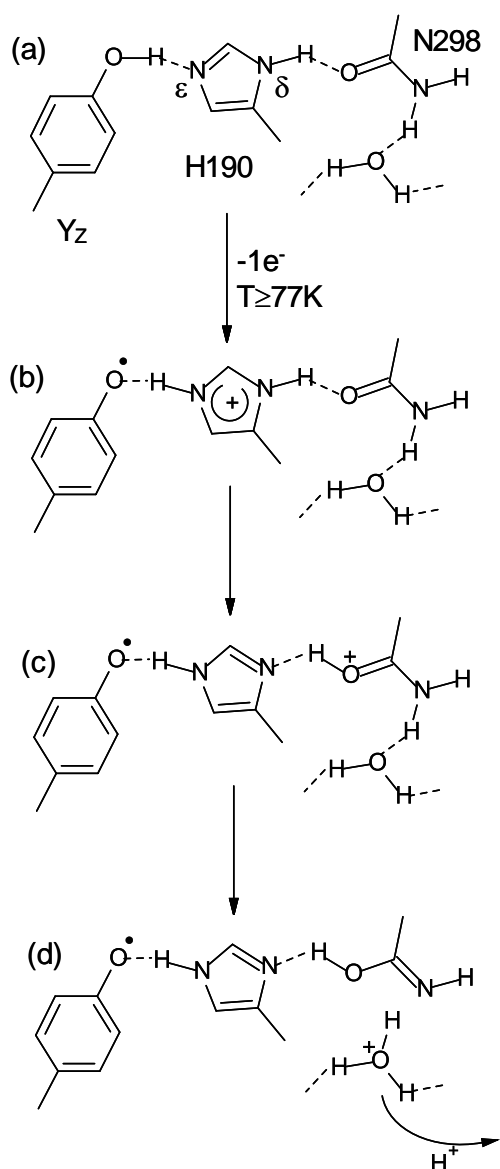

Scheme S1. Schematic illustration of the suggested deprotonation events which lead to proton exit after tyrosine oxidation in the  $S_2$  state. (a)  $Y_z$ /His190/Asn298 prior to electron transfer. Oxidation of  $Y_z$  by  $P_{680}^+$  initially leads to a state which is characterized by the wide EPR signal (b), followed by one characterized by the narrow EPR signal (c). Finally, one proton is expelled via a mechanism that involves amide to imidic acid tautomerism (d).

## Cartesian Coordinates of DFT Models

Figure depicting the full size of the 343-atom models:

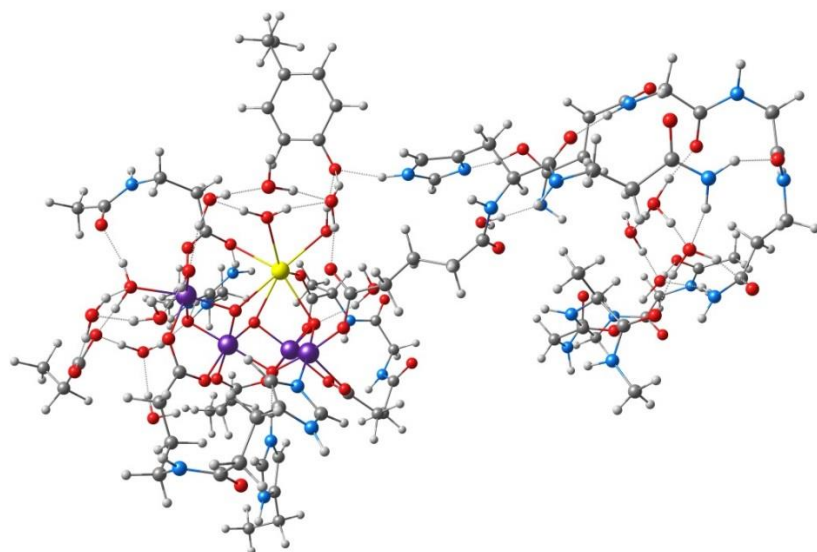

### Model 1

#### # W558

|    |              |               |               |   |              |               |               |
|----|--------------|---------------|---------------|---|--------------|---------------|---------------|
| Mn | 25.111405000 | 265.901562000 | 349.591667000 | C | 31.847764000 | 262.949999000 | 343.276862000 |
| Mn | 27.549225000 | 265.565094000 | 350.861329000 | O | 30.694323000 | 262.462383000 | 343.295410000 |
| Mn | 27.510169000 | 263.652951000 | 348.843608000 | H | 32.975660000 | 261.493750000 | 344.221540000 |
| Mn | 27.783639000 | 263.457794000 | 346.102651000 | N | 32.089075000 | 264.284467000 | 343.265974000 |
| Ca | 28.010236000 | 266.965916000 | 347.750057000 | C | 31.032000000 | 265.273990000 | 343.182010000 |
| O  | 26.679725000 | 266.851809000 | 349.834232000 | H | 31.119580000 | 265.798180000 | 342.334930000 |
| O  | 28.568123000 | 265.036489000 | 349.450955000 | C | 30.852282000 | 266.123986000 | 344.455243000 |
| O  | 26.190311000 | 264.413055000 | 350.170482000 | C | 30.025431000 | 265.523444000 | 345.612959000 |
| O  | 28.707398000 | 262.935802000 | 347.686277000 | O | 30.092866000 | 266.068847000 | 346.754576000 |
| O  | 26.956142000 | 264.606532000 | 347.359784000 | O | 29.222427000 | 264.564173000 | 345.313954000 |
| H  | 30.563980000 | 256.790870000 | 345.924360000 | H | 21.787259000 | 271.372980000 | 347.553611000 |
| C  | 30.505000000 | 257.418000000 | 346.833010000 | C | 22.609001000 | 271.709020000 | 348.186009000 |
| H  | 31.119800000 | 256.955650000 | 347.605250000 | C | 22.810183000 | 273.210410000 | 348.201551000 |
| C  | 29.041770000 | 257.722332000 | 347.194251000 | O | 23.148191000 | 273.810178000 | 349.230130000 |
| C  | 28.445199000 | 258.833843000 | 346.312151000 | C | 23.878235000 | 270.865546000 | 347.869821000 |
| O  | 29.200597000 | 259.884077000 | 346.173813000 | C | 23.463216000 | 269.377678000 | 347.759279000 |
| O  | 27.302510000 | 258.701255000 | 345.798483000 | C | 24.534636000 | 268.317638000 | 347.997961000 |
| H  | 31.021546000 | 258.363460000 | 346.583633000 | O | 25.642976000 | 268.316011000 | 347.392719000 |
| H  | 33.893680000 | 272.587130000 | 341.290820000 | O | 24.166211000 | 267.389781000 | 348.827752000 |
| C  | 33.179000000 | 272.187010000 | 342.010010000 | H | 23.051779000 | 269.181477000 | 346.748503000 |
| H  | 33.591770000 | 271.381890000 | 342.617880000 | H | 24.624304000 | 270.997773000 | 348.675107000 |
| C  | 31.880206000 | 271.686401000 | 341.315097000 | H | 22.650635000 | 269.164296000 | 348.474537000 |
| C  | 30.833606000 | 271.399516000 | 342.353940000 | H | 24.352455000 | 271.205061000 | 346.930996000 |
| C  | 29.798605000 | 272.351503000 | 342.621677000 | H | 19.443840000 | 261.850980000 | 348.348240000 |
| C  | 30.914830000 | 270.220583000 | 343.167348000 | C | 20.347000000 | 261.696010000 | 347.758000000 |
| C  | 28.901307000 | 272.162499000 | 343.656859000 | C | 21.353712000 | 260.915747000 | 348.571232000 |
| C  | 30.039530000 | 270.013897000 | 344.218089000 | O | 21.605608000 | 261.171722000 | 349.769716000 |
| C  | 29.008305000 | 270.992657000 | 344.508460000 | C | 20.961338000 | 262.992458000 | 347.166036000 |
| O  | 28.201870000 | 270.828126000 | 345.499927000 | C | 21.827359000 | 263.748244000 | 348.116234000 |
| H  | 30.074867000 | 269.120739000 | 344.854021000 | C | 23.172118000 | 264.074838000 | 348.076545000 |
| H  | 32.932370000 | 273.017529000 | 342.698053000 | N | 21.364968000 | 264.250518000 | 349.324224000 |
| H  | 32.104897000 | 270.768642000 | 340.738223000 | C | 22.381252000 | 264.851715000 | 349.978922000 |
| H  | 29.730864000 | 273.249161000 | 341.994069000 | N | 23.493021000 | 264.764341000 | 349.237170000 |
| H  | 31.510759000 | 272.448798000 | 340.606618000 | H | 20.147230000 | 263.639975000 | 346.788518000 |
| H  | 34.005210000 | 262.615900000 | 343.259770000 | H | 23.916060000 | 263.882008000 | 347.300788000 |
| C  | 33.066000000 | 262.063990000 | 343.297000000 | H | 22.304903000 | 265.352331000 | 350.943704000 |

|   |              |               |               |   |              |               |               |
|---|--------------|---------------|---------------|---|--------------|---------------|---------------|
| H | 21.586362000 | 262.730804000 | 346.294169000 | C | 34.984782000 | 264.156998000 | 351.621418000 |
| N | 21.995564000 | 259.952767000 | 347.870492000 | C | 33.901894000 | 264.903813000 | 350.831369000 |
| C | 23.071000000 | 259.170010000 | 348.449000000 | N | 32.922461000 | 263.982047000 | 350.233226000 |
| H | 22.721090000 | 258.770010000 | 349.400660000 | C | 31.996544000 | 264.336431000 | 349.315914000 |
| C | 24.360807000 | 259.996495000 | 348.646922000 | N | 31.822856000 | 265.633402000 | 349.001699000 |
| C | 24.942355000 | 260.529909000 | 347.333683000 | N | 31.291564000 | 263.406128000 | 348.656908000 |
| C | 25.943829000 | 261.656814000 | 347.475879000 | H | 37.585824000 | 261.870864000 | 351.030379000 |
| O | 26.181605000 | 262.174574000 | 348.618091000 | H | 35.401243000 | 262.576699000 | 350.181626000 |
| O | 26.483989000 | 262.047619000 | 346.384322000 | H | 36.465559000 | 263.983777000 | 350.040495000 |
| H | 24.153755000 | 260.936844000 | 346.667849000 | N | 22.557488000 | 273.863449000 | 347.012214000 |
| H | 21.744521000 | 259.802968000 | 346.895716000 | C | 22.951000000 | 275.252010000 | 346.817990000 |
| H | 25.116844000 | 259.381791000 | 349.169229000 | C | 24.157538000 | 275.367183000 | 345.841089000 |
| H | 25.451442000 | 259.738486000 | 346.749769000 | C | 25.316118000 | 274.542411000 | 346.305229000 |
| H | 24.129661000 | 260.845554000 | 349.309715000 | C | 25.808021000 | 273.341177000 | 345.817283000 |
| H | 25.458790000 | 259.267550000 | 354.767240000 | N | 26.031915000 | 274.880888000 | 347.444844000 |
| C | 25.515000000 | 259.965000000 | 355.603000000 | C | 26.932149000 | 273.922974000 | 347.646820000 |
| H | 25.321020000 | 259.480770000 | 356.560070000 | N | 26.825630000 | 272.972146000 | 346.680827000 |
| C | 24.578005000 | 261.176113000 | 355.346129000 | H | 22.482784000 | 273.279860000 | 346.176830000 |
| C | 24.651829000 | 261.747936000 | 353.951664000 | H | 27.443269000 | 272.165814000 | 346.514525000 |
| C | 25.489680000 | 262.671171000 | 353.340031000 | H | 23.273240000 | 275.614399000 | 347.815356000 |
| N | 23.751639000 | 261.376627000 | 352.953497000 | H | 24.435611000 | 276.434294000 | 345.778177000 |
| C | 24.009113000 | 262.031913000 | 351.804733000 | H | 25.523508000 | 272.730905000 | 344.959217000 |
| N | 25.070408000 | 262.819145000 | 352.024105000 | H | 27.632082000 | 273.890661000 | 348.483669000 |
| H | 25.517768000 | 263.450215000 | 351.280264000 | H | 23.842211000 | 275.041237000 | 344.832497000 |
| H | 26.563466000 | 260.317773000 | 355.630307000 | H | 30.268963000 | 267.027238000 | 344.188214000 |
| H | 26.333815000 | 263.242799000 | 353.727375000 | H | 31.810923000 | 266.481397000 | 344.872755000 |
| H | 23.421685000 | 261.935245000 | 350.886190000 | O | 27.576845000 | 266.101952000 | 343.268921000 |
| H | 24.999320000 | 267.480390000 | 355.837610000 | H | 26.743697000 | 266.586618000 | 343.022045000 |
| C | 25.565000000 | 267.226990000 | 354.941010000 | H | 27.258383000 | 265.253895000 | 343.718402000 |
| C | 26.440321000 | 268.434904000 | 354.624584000 | O | 26.528021000 | 260.498206000 | 343.868833000 |
| O | 26.004640000 | 269.421292000 | 354.014301000 | H | 27.238918000 | 261.168276000 | 344.019235000 |
| C | 24.589329000 | 266.891397000 | 353.817462000 | H | 26.748664000 | 259.834249000 | 344.591387000 |
| C | 25.209905000 | 266.378774000 | 352.527609000 | O | 24.605616000 | 262.331063000 | 344.289810000 |
| O | 26.458070000 | 266.080181000 | 352.507474000 | H | 24.258024000 | 262.437478000 | 343.383959000 |
| O | 24.416674000 | 266.262322000 | 351.536590000 | H | 25.252104000 | 261.553924000 | 344.203520000 |
| N | 27.724120000 | 268.376267000 | 355.109215000 | O | 30.056356000 | 260.774080000 | 348.556105000 |
| C | 28.598000000 | 269.534000000 | 355.099000000 | O | 28.437440000 | 269.416078000 | 347.751726000 |
| C | 29.612550000 | 269.648649000 | 353.950070000 | H | 28.447206000 | 269.895861000 | 346.873639000 |
| O | 30.361859000 | 270.636582000 | 353.867107000 | H | 29.255880000 | 269.672571000 | 348.219549000 |
| H | 29.133410000 | 269.629740000 | 356.043600000 | O | 27.896688000 | 267.579195000 | 345.381201000 |
| H | 28.013755000 | 267.549910000 | 355.629457000 | H | 27.845851000 | 266.953062000 | 344.565407000 |
| N | 29.587648000 | 268.633619000 | 353.060423000 | H | 27.238346000 | 268.273607000 | 345.151547000 |
| C | 30.261418000 | 268.662280000 | 351.766723000 | O | 25.772931000 | 269.577757000 | 345.060155000 |
| C | 29.532982000 | 267.680363000 | 350.838087000 | H | 26.490829000 | 270.246407000 | 345.141806000 |
| O | 29.628298000 | 267.777638000 | 349.599521000 | H | 25.672469000 | 269.198785000 | 345.990170000 |
| C | 31.756906000 | 268.303014000 | 351.857981000 | O | 26.646787000 | 269.610308000 | 350.095718000 |
| O | 28.872701000 | 266.768340000 | 351.496468000 | H | 26.588751000 | 268.624656000 | 350.175690000 |
| H | 32.230495000 | 268.373774000 | 350.862268000 | H | 27.076935000 | 269.720779000 | 349.219649000 |
| H | 28.892292000 | 267.892295000 | 353.182591000 | O | 26.743701000 | 264.032115000 | 344.692933000 |
| H | 30.155987000 | 269.673156000 | 351.328397000 | H | 25.910945000 | 263.479475000 | 344.571415000 |
| H | 31.884632000 | 267.282798000 | 352.261789000 | O | 28.642430000 | 262.010087000 | 344.998322000 |
| H | 32.264080000 | 269.013963000 | 352.530921000 | H | 29.427538000 | 262.282553000 | 344.435733000 |
| H | 30.864030000 | 260.791230000 | 354.757570000 | H | 28.860290000 | 261.082050000 | 345.508905000 |
| C | 31.178000000 | 261.334020000 | 353.866000000 | O | 27.852765000 | 259.651744000 | 349.907001000 |
| H | 32.129410000 | 261.846910000 | 354.006980000 | H | 25.506382000 | 268.492479000 | 343.659696000 |
| C | 30.203276000 | 262.398759000 | 353.316842000 | H | 25.358151000 | 268.317433000 | 342.119952000 |
| C | 29.015428000 | 261.848833000 | 352.499583000 | O | 25.391725000 | 267.805327000 | 342.949283000 |
| C | 28.429058000 | 262.886413000 | 351.556998000 | H | 27.367492000 | 260.495644000 | 349.990829000 |
| O | 28.235256000 | 264.076096000 | 352.006861000 | H | 28.700663000 | 259.969521000 | 349.491596000 |
| O | 28.158528000 | 262.510692000 | 350.367116000 | H | 31.695854000 | 269.480812000 | 342.948756000 |
| H | 28.197859000 | 261.495922000 | 353.159907000 | H | 28.109476000 | 272.889229000 | 343.875389000 |
| H | 30.784657000 | 263.063030000 | 352.646634000 | H | 25.936501000 | 276.288311000 | 347.972925000 |
| H | 29.309498000 | 260.984251000 | 351.878769000 | H | 33.014363000 | 261.352516000 | 342.455429000 |
| H | 29.830446000 | 263.054510000 | 354.125059000 | H | 33.057374000 | 264.597013000 | 343.215759000 |
| H | 36.466940000 | 262.009610000 | 352.392230000 | H | 30.095024000 | 264.698906000 | 343.059864000 |
| C | 37.013000000 | 262.588010000 | 351.647000000 | H | 22.298251000 | 271.452666000 | 349.216428000 |
| H | 37.736650000 | 263.287660000 | 352.065240000 | H | 20.003150000 | 261.084745000 | 346.902371000 |
| C | 35.966465000 | 263.322308000 | 350.776463000 | H | 23.259036000 | 258.314042000 | 347.777980000 |

|   |              |               |               |   |              |               |               |
|---|--------------|---------------|---------------|---|--------------|---------------|---------------|
| H | 26.187048000 | 266.348503000 | 355.190396000 | N | 22.912556000 | 274.940572000 | 355.664556000 |
| H | 23.866104000 | 266.122190000 | 354.149091000 | C | 22.539999000 | 274.355990000 | 354.399991000 |
| H | 23.991697000 | 267.780358000 | 353.545811000 | C | 21.459641000 | 275.179855000 | 353.692111000 |
| H | 27.963925000 | 270.435510000 | 355.004977000 | O | 20.837294000 | 276.106940000 | 354.233397000 |
| H | 31.365419000 | 260.568531000 | 353.086903000 | H | 22.252661000 | 273.406850000 | 354.528709000 |
| H | 32.976306000 | 262.995969000 | 350.481565000 | N | 21.206995000 | 274.786698000 | 352.412023000 |
| H | 30.000849000 | 260.310312000 | 347.671877000 | C | 20.285000000 | 275.553011000 | 351.592011000 |
| H | 29.461851000 | 261.550849000 | 348.342792000 | C | 18.840793000 | 275.433060000 | 352.027591000 |
| H | 24.804824000 | 261.986788000 | 356.061746000 | O | 17.973123000 | 276.239912000 | 351.604931000 |
| H | 23.526930000 | 260.886184000 | 355.533148000 | C | 20.436398000 | 275.202822000 | 350.103016000 |
| H | 33.378753000 | 265.606191000 | 351.510731000 | O | 22.033366000 | 277.377336000 | 346.117698000 |
| H | 34.366968000 | 265.501904000 | 350.022943000 | O | 20.424898000 | 278.931902000 | 349.552979000 |
| H | 35.547601000 | 264.917366000 | 352.195862000 | O | 21.979430000 | 278.685147000 | 351.551762000 |
| H | 34.496143000 | 263.510821000 | 352.380107000 | O | 21.313721000 | 278.974510000 | 354.072006000 |
| H | 28.958933000 | 258.089479000 | 348.235046000 | H | 20.518446000 | 274.615927000 | 346.486157000 |
| H | 28.399040000 | 256.828400000 | 347.119882000 | H | 18.703122000 | 275.599120000 | 345.412502000 |
| H | 31.125217000 | 265.878450000 | 348.284765000 | H | 19.636907000 | 277.409816000 | 347.631026000 |
| H | 32.110525000 | 266.367256000 | 349.640773000 | H | 18.044127000 | 276.654631000 | 347.432560000 |
| H | 30.379139000 | 263.637809000 | 348.226917000 | H | 17.411468000 | 280.219024000 | 347.248776000 |
| H | 31.393587000 | 262.403969000 | 348.849743000 | H | 17.442084000 | 278.798862000 | 348.249365000 |
| H | 20.423281000 | 264.126470000 | 349.693447000 | H | 24.844431000 | 279.286545000 | 346.794459000 |
| H | 22.987112000 | 260.710454000 | 353.070323000 | H | 22.962022000 | 278.291595000 | 348.230530000 |
| C | 21.820729000 | 276.167877000 | 346.349992000 | H | 23.577684000 | 279.230921000 | 349.596941000 |
| N | 20.618114000 | 275.584179000 | 346.181663000 | H | 23.871424000 | 277.047139000 | 350.587145000 |
| C | 19.446000000 | 276.340000000 | 345.755000000 | H | 22.815539000 | 279.181113000 | 351.465569000 |
| H | 19.680950000 | 276.898580000 | 344.959520000 | H | 22.326012000 | 279.219211000 | 346.489698000 |
| C | 18.841999000 | 277.191010000 | 346.890020000 | H | 20.516285000 | 280.329561000 | 345.695450000 |
| C | 18.358531000 | 278.571431000 | 346.429619000 | H | 21.532633000 | 281.788334000 | 345.486578000 |
| N | 17.555039000 | 279.204115000 | 347.315135000 | H | 19.795229000 | 283.126159000 | 346.077068000 |
| O | 18.719755000 | 279.081131000 | 345.349528000 | H | 19.724366000 | 283.994233000 | 348.715178000 |
| H | 25.275691000 | 280.167699000 | 348.188078000 | H | 18.814811000 | 283.399365000 | 350.541857000 |
| C | 24.481999000 | 279.798001000 | 347.704992000 | H | 16.825258000 | 281.183952000 | 350.508408000 |
| C | 23.419010000 | 280.807537000 | 347.296939000 | H | 18.342864000 | 281.982299000 | 353.052795000 |
| O | 23.475823000 | 282.029816000 | 347.518867000 | H | 19.261542000 | 281.195395000 | 351.759139000 |
| C | 23.880639000 | 278.739572000 | 348.656565000 | H | 19.460242000 | 279.492008000 | 353.744996000 |
| C | 24.786730000 | 277.559553000 | 348.969606000 | H | 18.209766000 | 278.289414000 | 353.655570000 |
| N | 24.658264000 | 276.769949000 | 349.987473000 | H | 17.455651000 | 278.831778000 | 350.636201000 |
| O | 25.712330000 | 277.335634000 | 348.033944000 | H | 18.102072000 | 277.414794000 | 350.603359000 |
| N | 22.353671000 | 280.233111000 | 346.656416000 | H | 21.427070000 | 283.452766000 | 357.018109000 |
| C | 21.223999000 | 281.008999000 | 346.209990000 | H | 22.728286000 | 282.171276000 | 358.199289000 |
| C | 20.461569000 | 281.666823000 | 347.349565000 | H | 24.184124000 | 280.496672000 | 358.772898000 |
| O | 20.447756000 | 281.230521000 | 348.530998000 | H | 24.787202000 | 280.514771000 | 357.093507000 |
| N | 19.744674000 | 282.755594000 | 347.024603000 | H | 25.035923000 | 278.329893000 | 356.942132000 |
| C | 19.011000000 | 283.493010000 | 348.032991000 | H | 24.445268000 | 276.075228000 | 357.609593000 |
| C | 18.055367000 | 282.594684000 | 348.829072000 | H | 22.742447000 | 276.599156000 | 357.703965000 |
| O | 17.259326000 | 281.827930000 | 348.258189000 | H | 22.519150000 | 274.544536000 | 356.516502000 |
| H | 18.434830000 | 284.191610000 | 347.608230000 | H | 23.427951000 | 274.338822000 | 353.736985000 |
| N | 18.103059000 | 282.773697000 | 350.168038000 | H | 21.819714000 | 274.110658000 | 351.952187000 |
| C | 17.337001000 | 281.957000000 | 351.103004000 | H | 21.459229000 | 275.428777000 | 349.759540000 |
| H | 16.641987000 | 282.518131000 | 351.552545000 | H | 20.239852000 | 274.131011000 | 349.923198000 |
| C | 18.238001000 | 281.334020000 | 352.162991000 | H | 19.723013000 | 275.792438000 | 349.505585000 |
| C | 17.737019000 | 279.949866000 | 352.599395000 | H | 20.511224000 | 279.861695000 | 349.074101000 |
| N | 18.502497000 | 279.246986000 | 353.458252000 | H | 19.405772000 | 278.737510000 | 349.824122000 |
| O | 16.676496000 | 279.468827000 | 352.130344000 | H | 21.716238000 | 278.809772000 | 352.532419000 |
| O | 18.065330000 | 278.288209000 | 350.067073000 | H | 21.049482000 | 278.887462000 | 350.393028000 |
| H | 22.031620000 | 283.602460000 | 355.441470000 | H | 21.418610000 | 278.074975000 | 354.459592000 |
| C | 21.583000000 | 282.946990000 | 356.049010000 | H | 21.890341000 | 279.603524000 | 354.593535000 |
| C | 22.466436000 | 281.733790000 | 356.209757000 | N | 18.545221000 | 274.421164000 | 352.840366000 |
| O | 22.731812000 | 280.953687000 | 355.263990000 | C | 17.201000000 | 274.185000000 | 353.303010000 |
| H | 20.684750000 | 282.662970000 | 355.713620000 | H | 17.041754000 | 274.523807000 | 354.230291000 |
| N | 22.995314000 | 281.549635000 | 357.439908000 | H | 17.005139000 | 273.205040000 | 353.266725000 |
| C | 23.874000000 | 280.441010000 | 357.715000000 | H | 20.532629000 | 276.626586000 | 351.718109000 |
| C | 23.199480000 | 279.081045000 | 357.499749000 | H | 19.304188000 | 273.810551000 | 353.140112000 |
| O | 21.987160000 | 278.897559000 | 357.673474000 | H | 16.505038000 | 274.704389000 | 352.624842000 |
| N | 24.079621000 | 278.089153000 | 357.195063000 | O | 26.691879000 | 274.964610000 | 350.579829000 |
| C | 23.678000000 | 276.709990000 | 357.126010000 | H | 27.077356000 | 275.469456000 | 351.319033000 |
| C | 23.458324000 | 276.191228000 | 355.704207000 | H | 25.890423000 | 275.525091000 | 350.326885000 |
| O | 23.783567000 | 276.819978000 | 354.688766000 |   |              |               |               |

## Model 2

### # W628

|    |              |               |               |   |              |               |               |
|----|--------------|---------------|---------------|---|--------------|---------------|---------------|
| Mn | 25.110102000 | 265.897561000 | 349.593696000 | C | 21.353035000 | 260.915010000 | 348.571378000 |
| Mn | 27.548366000 | 265.563294000 | 350.861072000 | O | 21.603216000 | 261.169452000 | 349.770631000 |
| Mn | 27.508820000 | 263.651951000 | 348.842093000 | C | 20.960647000 | 262.992578000 | 347.166286000 |
| Mn | 27.780857000 | 263.458162000 | 346.100789000 | C | 21.826598000 | 263.747111000 | 348.117223000 |
| Ca | 28.008097000 | 266.961848000 | 347.750312000 | C | 23.171855000 | 264.071457000 | 348.078807000 |
| O  | 26.677867000 | 266.849183000 | 349.834787000 | N | 21.364210000 | 264.248209000 | 349.325718000 |
| O  | 28.566173000 | 265.035247000 | 349.449024000 | C | 22.381147000 | 264.846855000 | 349.981777000 |
| O  | 26.190119000 | 264.409513000 | 350.170309000 | N | 23.493052000 | 264.758685000 | 349.240493000 |
| O  | 28.706460000 | 262.937232000 | 347.682882000 | H | 20.146219000 | 263.640138000 | 346.789540000 |
| O  | 26.952811000 | 264.604721000 | 347.357826000 | H | 23.916156000 | 263.878709000 | 347.303409000 |
| H  | 30.563980000 | 256.790870000 | 345.924360000 | H | 22.305278000 | 265.346767000 | 350.946957000 |
| C  | 30.505000000 | 257.418000000 | 346.833010000 | H | 21.585536000 | 262.731656000 | 346.294102000 |
| H  | 31.119800000 | 256.955650000 | 347.605250000 | N | 21.995307000 | 259.952531000 | 347.870466000 |
| C  | 29.042560000 | 257.723537000 | 347.194977000 | C | 23.071000000 | 259.170010000 | 348.449000000 |
| C  | 28.446008000 | 258.833725000 | 346.311205000 | H | 22.721090000 | 258.770010000 | 349.400660000 |
| O  | 29.201569000 | 259.882991000 | 346.169140000 | C | 24.359896000 | 259.997422000 | 348.646844000 |
| O  | 27.302426000 | 258.700171000 | 345.799146000 | C | 24.943171000 | 260.527228000 | 346.752925000 |
| H  | 31.022163000 | 258.363188000 | 346.583819000 | C | 25.943456000 | 261.655072000 | 347.474366000 |
| H  | 33.893680000 | 272.587130000 | 341.290820000 | O | 26.180467000 | 262.173647000 | 348.616299000 |
| C  | 33.179000000 | 272.187010000 | 342.010010000 | O | 26.483434000 | 262.045345000 | 346.382532000 |
| H  | 33.591770000 | 271.381890000 | 342.617880000 | H | 24.155529000 | 260.931027000 | 346.664321000 |
| C  | 31.879503000 | 271.685539000 | 341.319467000 | H | 21.746235000 | 259.804890000 | 346.894830000 |
| C  | 30.832341000 | 271.390408000 | 342.357815000 | H | 25.115032000 | 259.384407000 | 349.172308000 |
| C  | 29.772217000 | 272.317679000 | 342.604149000 | H | 25.454268000 | 259.734424000 | 346.752925000 |
| C  | 30.935212000 | 270.227264000 | 343.189129000 | H | 24.127157000 | 260.848450000 | 349.306587000 |
| C  | 28.868852000 | 272.118778000 | 343.634301000 | H | 25.458790000 | 259.267550000 | 354.767240000 |
| C  | 30.054632000 | 270.012608000 | 344.235688000 | C | 25.515000000 | 259.965000000 | 355.603000000 |
| C  | 28.995952000 | 270.965343000 | 344.501659000 | H | 25.321020000 | 259.480770000 | 356.560070000 |
| O  | 28.179981000 | 270.792309000 | 345.488210000 | C | 24.578529000 | 261.176568000 | 355.346533000 |
| H  | 30.109948000 | 269.128761000 | 344.883017000 | C | 24.652035000 | 261.747465000 | 353.951761000 |
| H  | 32.932848000 | 273.017261000 | 342.698646000 | C | 25.490677000 | 262.668967000 | 353.338594000 |
| H  | 32.104781000 | 270.770124000 | 340.738488000 | N | 23.750793000 | 261.376156000 | 352.954561000 |
| H  | 29.687421000 | 273.206032000 | 341.965303000 | C | 24.008695000 | 262.029611000 | 351.804835000 |
| H  | 31.505580000 | 272.447399000 | 340.612623000 | N | 25.071095000 | 262.815675000 | 352.022663000 |
| H  | 34.005210000 | 262.615900000 | 343.259770000 | H | 25.518635000 | 263.446214000 | 351.278092000 |
| C  | 33.066000000 | 262.063990000 | 343.297000000 | H | 26.563588000 | 260.317454000 | 355.630294000 |
| C  | 31.847916000 | 262.950017000 | 343.276021000 | H | 26.335218000 | 263.240560000 | 353.725087000 |
| O  | 30.694348000 | 262.462052000 | 343.293107000 | H | 23.420879000 | 261.932319000 | 350.886662000 |
| H  | 32.975660000 | 261.493750000 | 344.221540000 | H | 24.999320000 | 267.480390000 | 355.837610000 |
| N  | 32.089012000 | 264.284221000 | 343.265442000 | C | 25.565000000 | 267.226990000 | 354.941010000 |
| C  | 31.032001000 | 265.273990000 | 343.182010000 | C | 26.440056000 | 268.434717000 | 354.623346000 |
| H  | 31.119580000 | 265.798180000 | 342.334930000 | O | 26.004897000 | 269.419651000 | 354.010394000 |
| C  | 30.853023000 | 266.122912000 | 344.455983000 | C | 24.589376000 | 266.889679000 | 353.818089000 |
| C  | 30.022909000 | 265.522545000 | 345.611245000 | C | 25.209581000 | 266.374829000 | 352.528128000 |
| O  | 30.091068000 | 266.063919000 | 346.754719000 | O | 26.458053000 | 266.077284000 | 352.508117000 |
| O  | 29.216584000 | 264.566680000 | 345.309411000 | O | 24.415642000 | 266.255797000 | 351.538877000 |
| H  | 21.787260000 | 271.372980000 | 347.553610000 | N | 27.722823000 | 268.377319000 | 355.110474000 |
| C  | 22.609000000 | 271.709020000 | 348.186010000 | C | 28.598000000 | 269.534000000 | 355.099000000 |
| C  | 22.837702000 | 273.206546000 | 348.195142000 | C | 29.614505000 | 269.644786000 | 353.951357000 |
| O  | 23.246186000 | 273.792842000 | 349.202351000 | O | 30.371633000 | 270.626932000 | 353.872353000 |
| C  | 23.874221000 | 270.856422000 | 347.876977000 | H | 29.133410000 | 269.629740000 | 356.043600000 |
| C  | 23.454127000 | 269.370713000 | 347.767465000 | H | 28.012469000 | 267.550667000 | 355.630261000 |
| C  | 24.526267000 | 268.310025000 | 347.999603000 | N | 29.582219000 | 268.632921000 | 353.058359000 |
| O  | 25.630494000 | 268.306417000 | 347.388049000 | C | 30.261544000 | 268.657309000 | 351.767468000 |
| O  | 24.161049000 | 267.383327000 | 348.833034000 | C | 29.532779000 | 267.677155000 | 350.837279000 |
| H  | 23.037129000 | 269.175987000 | 346.758640000 | O | 29.627822000 | 267.774854000 | 349.599036000 |
| H  | 24.618427000 | 270.987213000 | 348.684101000 | C | 31.754614000 | 268.290199000 | 351.866011000 |
| H  | 22.645144000 | 269.158795000 | 348.487303000 | O | 28.871626000 | 266.765122000 | 351.495653000 |
| H  | 24.352708000 | 271.192445000 | 346.939152000 | H | 32.232888000 | 268.357886000 | 350.872423000 |
| H  | 19.443840000 | 261.850980000 | 348.348240000 | H | 28.883385000 | 267.894730000 | 353.179061000 |
| C  | 20.347000000 | 261.696010000 | 347.758000000 | H | 30.163229000 | 269.668113000 | 351.327377000 |

|   |              |               |               |   |              |               |               |
|---|--------------|---------------|---------------|---|--------------|---------------|---------------|
| H | 31.874806000 | 267.269422000 | 352.270593000 | O | 28.642141000 | 262.011186000 | 344.995009000 |
| H | 32.262493000 | 268.998969000 | 352.540715000 | H | 29.427912000 | 262.284179000 | 344.433480000 |
| H | 30.864030000 | 260.791230000 | 354.757570000 | H | 28.859882000 | 261.084024000 | 345.504365000 |
| C | 31.178000000 | 261.334020000 | 353.866000000 | O | 27.856809000 | 259.653353000 | 349.902569000 |
| H | 32.129410000 | 261.846910000 | 354.006980000 | H | 25.497827000 | 268.480141000 | 343.654613000 |
| C | 30.202011000 | 262.398029000 | 353.317560000 | H | 25.372721000 | 268.312243000 | 342.111855000 |
| C | 29.018583000 | 261.846691000 | 352.495048000 | O | 25.383962000 | 267.796536000 | 342.939581000 |
| C | 28.430448000 | 262.884641000 | 351.554107000 | H | 27.377071000 | 260.499537000 | 349.995026000 |
| O | 28.236515000 | 264.073659000 | 352.004931000 | H | 28.705017000 | 259.969280000 | 349.486566000 |
| O | 28.158764000 | 262.509344000 | 350.364151000 | H | 31.736688000 | 269.503897000 | 342.989937000 |
| H | 28.200363000 | 261.487615000 | 353.151316000 | H | 28.057784000 | 272.829039000 | 343.836168000 |
| H | 30.783097000 | 263.066416000 | 352.651291000 | H | 25.931209000 | 276.291474000 | 347.964745000 |
| H | 29.317925000 | 260.985369000 | 351.872193000 | H | 33.014618000 | 261.352396000 | 342.455501000 |
| H | 29.824941000 | 263.049816000 | 354.126999000 | H | 33.057405000 | 264.597063000 | 343.218372000 |
| H | 36.466940000 | 262.009610000 | 352.392230000 | H | 30.094918000 | 264.699228000 | 343.059508000 |
| C | 37.013000000 | 262.588010000 | 351.647000000 | H | 22.294961000 | 271.461404000 | 349.217730000 |
| H | 37.736650000 | 263.287660000 | 352.065240000 | H | 20.003271000 | 261.084562000 | 346.902406000 |
| C | 35.968870000 | 263.321337000 | 350.773396000 | H | 23.259622000 | 258.314163000 | 347.77985000  |
| C | 34.990518000 | 264.164229000 | 351.613741000 | H | 26.187371000 | 266.348828000 | 355.190884000 |
| C | 33.911923000 | 264.911529000 | 350.818707000 | H | 23.866281000 | 266.120890000 | 354.150942000 |
| N | 32.927301000 | 263.991253000 | 350.226311000 | H | 23.991786000 | 267.778200000 | 353.544804000 |
| C | 32.001395000 | 264.346292000 | 349.308830000 | H | 27.965526000 | 270.436456000 | 355.003380000 |
| N | 31.836641000 | 265.641986000 | 348.986514000 | H | 31.365695000 | 260.568639000 | 353.086865000 |
| N | 31.287448000 | 263.416673000 | 348.658375000 | H | 32.976019000 | 263.006674000 | 350.481629000 |
| H | 37.586632000 | 261.870118000 | 351.031857000 | H | 30.003777000 | 260.313982000 | 347.667238000 |
| H | 35.401117000 | 262.574858000 | 350.182071000 | H | 29.463722000 | 261.554621000 | 348.337534000 |
| H | 36.470398000 | 263.977231000 | 350.034095000 | H | 24.806411000 | 261.987278000 | 356.061767000 |
| N | 22.528251000 | 273.873275000 | 347.022235000 | H | 23.527370000 | 260.887433000 | 355.534221000 |
| C | 22.951000000 | 275.252010000 | 346.817990000 | H | 33.392757000 | 265.621540000 | 351.492985000 |
| C | 24.159433000 | 275.344375000 | 345.840841000 | H | 34.380566000 | 265.501303000 | 350.006048000 |
| C | 25.307989000 | 274.507168000 | 346.306941000 | H | 35.556477000 | 264.925289000 | 352.184154000 |
| C | 25.789064000 | 273.302478000 | 345.815749000 | H | 34.498660000 | 263.524388000 | 352.375711000 |
| N | 26.029122000 | 274.841981000 | 347.443353000 | H | 28.961989000 | 258.092809000 | 348.235155000 |
| C | 26.922452000 | 273.877780000 | 347.640869000 | H | 28.399173000 | 256.829868000 | 347.123305000 |
| N | 26.806975000 | 272.926160000 | 346.675248000 | H | 31.142680000 | 265.889472000 | 348.266443000 |
| H | 22.429142000 | 273.293112000 | 346.186818000 | H | 32.138180000 | 266.378950000 | 349.615516000 |
| H | 27.421424000 | 272.118158000 | 346.502438000 | H | 30.376830000 | 263.652319000 | 348.227363000 |
| H | 23.276162000 | 275.621102000 | 347.812393000 | H | 31.383902000 | 262.414437000 | 348.853516000 |
| H | 24.452550000 | 276.407206000 | 345.774179000 | H | 20.422320000 | 264.124494000 | 349.694506000 |
| H | 25.497522000 | 272.693712000 | 344.958846000 | H | 22.985534000 | 260.711056000 | 353.072578000 |
| H | 27.627342000 | 273.839906000 | 348.473376000 | C | 21.833168000 | 276.179236000 | 346.332279000 |
| H | 23.839596000 | 275.017908000 | 344.833622000 | N | 20.614388000 | 275.607861000 | 346.210061000 |
| H | 30.274932000 | 267.029601000 | 344.189374000 | C | 19.446000000 | 276.340000000 | 345.755000000 |
| H | 31.812570000 | 266.475512000 | 344.875562000 | H | 19.680950000 | 276.898580000 | 344.959520000 |
| O | 27.572230000 | 266.094491000 | 343.257733000 | C | 18.841999000 | 277.191010000 | 346.890020000 |
| H | 26.739098000 | 266.581096000 | 343.014268000 | C | 17.492043000 | 277.836749000 | 346.675544000 |
| H | 27.252979000 | 265.247532000 | 343.707503000 | N | 17.085069000 | 278.121106000 | 345.431253000 |
| O | 26.529844000 | 260.493885000 | 343.867401000 | O | 16.752986000 | 278.118417000 | 347.664729000 |
| H | 27.240107000 | 261.164735000 | 344.017070000 | H | 25.275691000 | 280.167700000 | 348.188079000 |
| H | 26.749508000 | 259.831547000 | 344.591964000 | C | 24.482000000 | 279.798000000 | 347.704991000 |
| O | 24.602844000 | 262.321479000 | 344.282759000 | C | 23.441491000 | 280.810615000 | 347.255711000 |
| H | 24.262053000 | 262.431142000 | 343.374698000 | O | 23.535680000 | 282.041431000 | 347.409131000 |
| H | 25.252165000 | 261.546201000 | 344.197498000 | C | 23.880639000 | 278.739572000 | 348.656565000 |
| O | 30.059413000 | 260.778502000 | 348.550842000 | C | 24.785592000 | 277.555167000 | 348.953613000 |
| O | 28.432320000 | 269.408549000 | 347.743649000 | N | 24.664160000 | 276.779163000 | 349.976882000 |
| H | 28.435061000 | 269.883152000 | 346.860511000 | O | 25.699141000 | 277.322922000 | 347.997275000 |
| H | 29.249017000 | 269.676041000 | 348.207901000 | N | 22.366420000 | 280.236266000 | 346.632002000 |
| O | 27.885944000 | 267.562412000 | 345.380361000 | C | 21.223999000 | 281.008999000 | 346.209990000 |
| H | 27.840273000 | 266.939799000 | 344.562788000 | C | 20.545367000 | 281.738445000 | 347.369470000 |
| H | 27.224994000 | 268.254026000 | 345.151078000 | O | 20.644572000 | 281.368128000 | 348.557342000 |
| O | 25.758967000 | 269.567787000 | 345.047198000 | N | 19.784324000 | 282.799502000 | 347.022759000 |
| H | 26.499921000 | 270.213762000 | 345.128573000 | C | 19.011000000 | 283.493010000 | 348.032991000 |
| H | 25.653552000 | 269.189044000 | 345.975720000 | C | 18.128599000 | 282.503986000 | 348.820598000 |
| O | 26.636443000 | 269.610854000 | 350.083106000 | O | 17.520515000 | 281.577410000 | 348.265212000 |
| H | 26.583370000 | 268.625622000 | 350.168650000 | H | 18.434830000 | 284.191610000 | 347.608730000 |
| H | 27.071618000 | 269.718461000 | 349.208945000 | N | 18.067168000 | 282.779284000 | 350.148609000 |
| O | 26.737983000 | 264.028100000 | 344.690377000 | C | 17.337001000 | 281.957000000 | 351.103004000 |
| H | 25.906817000 | 263.472862000 | 344.571870000 | H | 16.641987000 | 282.518131000 | 351.552545000 |



|   |              |               |               |   |              |               |               |
|---|--------------|---------------|---------------|---|--------------|---------------|---------------|
| C | 18.238001000 | 281.334020000 | 352.162991000 | H | 22.318113000 | 279.216242000 | 346.526812000 |
| C | 18.005061000 | 279.828910000 | 352.310378000 | H | 20.487834000 | 280.317237000 | 345.762352000 |
| N | 18.914838000 | 279.088738000 | 352.956803000 | H | 21.501792000 | 281.744951000 | 345.429705000 |
| O | 16.969161000 | 279.290124000 | 351.814859000 | H | 19.718670000 | 283.087053000 | 346.048545000 |
| O | 17.868664000 | 277.961449000 | 349.867128000 | H | 19.701505000 | 284.005304000 | 348.731344000 |
| H | 22.031620000 | 283.602460000 | 355.441470000 | H | 18.648542000 | 283.534255000 | 350.509125000 |
| C | 21.583000000 | 282.946990000 | 356.049010000 | H | 16.823508000 | 281.175660000 | 350.520086000 |
| C | 22.495011000 | 281.755686000 | 356.208033000 | H | 18.075547000 | 281.791827000 | 353.157248000 |
| O | 22.832694000 | 281.025042000 | 355.248333000 | H | 19.306614000 | 281.493319000 | 351.923424000 |
| H | 20.684750000 | 282.662970000 | 355.713620000 | H | 19.834538000 | 279.393681000 | 353.326867000 |
| N | 22.983763000 | 281.543870000 | 357.452047000 | H | 18.708279000 | 278.097142000 | 353.083527000 |
| C | 23.874000000 | 280.441010000 | 357.715000000 | H | 17.375822000 | 278.521870000 | 350.593119000 |
| C | 23.202113000 | 279.079308000 | 357.506928000 | H | 17.948743000 | 277.003128000 | 350.326534000 |
| O | 21.991677000 | 278.895324000 | 357.694946000 | H | 21.424242000 | 283.453398000 | 357.017571000 |
| N | 24.080049000 | 278.088693000 | 357.194412000 | H | 22.653725000 | 282.113644000 | 358.227144000 |
| C | 23.678000000 | 276.709990000 | 357.126010000 | H | 24.197519000 | 280.496762000 | 358.769008000 |
| C | 23.441847000 | 276.196747000 | 355.705695000 | H | 24.777026000 | 280.523389000 | 357.080907000 |
| O | 23.730124000 | 276.843867000 | 354.690529000 | H | 25.030160000 | 278.331855000 | 356.920802000 |
| N | 22.926451000 | 274.934123000 | 355.663703000 | H | 24.450023000 | 276.073909000 | 357.600221000 |
| C | 22.540000000 | 274.355990000 | 354.399990000 | H | 22.748373000 | 276.596816000 | 357.712983000 |
| C | 21.437792000 | 275.175087000 | 353.714770000 | H | 22.561943000 | 274.519439000 | 356.519521000 |
| O | 20.800651000 | 276.078044000 | 354.275748000 | H | 23.416892000 | 274.348082000 | 353.722801000 |
| H | 22.252660000 | 273.406850000 | 354.528710000 | H | 21.815177000 | 274.126751000 | 351.975308000 |
| N | 21.178378000 | 274.779187000 | 352.435976000 | H | 21.712664000 | 275.635687000 | 349.964925000 |
| C | 20.285000000 | 275.553011000 | 351.592011000 | H | 20.476718000 | 274.348636000 | 349.767561000 |
| C | 18.821273000 | 275.286036000 | 351.853735000 | H | 20.053834000 | 276.071523000 | 349.491154000 |
| O | 17.909618000 | 275.866111000 | 351.190367000 | H | 20.702262000 | 279.727013000 | 349.047763000 |
| C | 20.650029000 | 275.384178000 | 350.110141000 | H | 17.327279000 | 277.980934000 | 348.913024000 |
| O | 22.054609000 | 277.369342000 | 346.030832000 | H | 22.101777000 | 278.442055000 | 352.230847000 |
| O | 20.603641000 | 278.783771000 | 349.362474000 | H | 19.648070000 | 278.683354000 | 349.567668000 |
| O | 22.259568000 | 277.932349000 | 351.398735000 | H | 21.720107000 | 278.177961000 | 354.338588000 |
| O | 21.560682000 | 279.041923000 | 353.900336000 | H | 22.067185000 | 279.717553000 | 354.429630000 |
| H | 20.505930000 | 274.656647000 | 346.564366000 | N | 18.540876000 | 274.444757000 | 352.843051000 |
| H | 18.704146000 | 275.589548000 | 345.428262000 | C | 17.201000000 | 274.185000000 | 353.303010000 |
| H | 19.560119000 | 277.982840000 | 347.189039000 | H | 17.041754000 | 274.523807000 | 354.230291000 |
| H | 18.736347000 | 276.546864000 | 347.779607000 | H | 17.005139000 | 273.205040000 | 353.266725000 |
| H | 16.189968000 | 278.590470000 | 345.293123000 | H | 20.452456000 | 276.622144000 | 351.844324000 |
| H | 17.646930000 | 277.918526000 | 344.608556000 | H | 19.328965000 | 273.994917000 | 353.306875000 |
| H | 24.856017000 | 279.284016000 | 346.799123000 | H | 16.501137000 | 274.699803000 | 352.626010000 |
| H | 22.952493000 | 278.298079000 | 348.245173000 | O | 26.662487000 | 274.965638000 | 350.578202000 |
| H | 23.579610000 | 279.208212000 | 349.609264000 | H | 27.047411000 | 275.481137000 | 351.310450000 |
| H | 23.884449000 | 277.077686000 | 350.588887000 | H | 25.865368000 | 275.532635000 | 350.309542000 |
| H | 21.650619000 | 278.322934000 | 350.714988000 |   |              |               |               |

### Model 3

#### # W604

|    |              |               |               |   |              |               |               |
|----|--------------|---------------|---------------|---|--------------|---------------|---------------|
| Mn | 25.106951000 | 265.876342000 | 349.601059000 | C | 31.883922000 | 271.682830000 | 341.311648000 |
| Mn | 27.548352000 | 265.556347000 | 350.861332000 | C | 30.833984000 | 271.375258000 | 342.341913000 |
| Mn | 27.515528000 | 263.642593000 | 348.842776000 | C | 29.751487000 | 272.282405000 | 342.571010000 |
| Mn | 27.785248000 | 263.449110000 | 346.100383000 | C | 30.952625000 | 270.217625000 | 343.180944000 |
| Ca | 27.995083000 | 266.946133000 | 347.746801000 | C | 28.842489000 | 272.070893000 | 343.592417000 |
| O  | 26.671090000 | 266.838249000 | 349.835316000 | C | 30.066878000 | 269.991078000 | 344.219009000 |
| O  | 28.568217000 | 265.030643000 | 349.449525000 | C | 28.986042000 | 270.924869000 | 344.469149000 |
| O  | 26.195869000 | 264.396140000 | 350.172902000 | O | 28.168870000 | 270.742006000 | 345.450304000 |
| O  | 28.713350000 | 262.930023000 | 347.682885000 | H | 30.133431000 | 269.113678000 | 344.873889000 |
| O  | 26.955110000 | 264.593395000 | 347.359230000 | H | 32.928484000 | 273.016754000 | 342.697398000 |
| H  | 30.563980000 | 256.790870000 | 345.924360000 | H | 32.117388000 | 270.770780000 | 340.728270000 |
| C  | 30.505000000 | 257.418000000 | 346.833010000 | H | 29.654866000 | 273.164079000 | 341.924854000 |
| H  | 31.119800000 | 256.955650000 | 347.605250000 | H | 31.509339000 | 272.445517000 | 340.606355000 |
| C  | 29.041596000 | 257.721069000 | 347.193293000 | H | 34.005210000 | 262.615900000 | 343.259770000 |
| C  | 28.445101000 | 258.829590000 | 346.307836000 | C | 33.066000000 | 262.063990000 | 343.297000000 |
| O  | 29.201194000 | 259.878615000 | 346.165014000 | C | 31.848150000 | 262.950245000 | 343.275207000 |
| O  | 27.301863000 | 258.696006000 | 345.795549000 | O | 30.694573000 | 262.462469000 | 343.289163000 |
| H  | 31.021589000 | 258.363486000 | 346.584130000 | H | 32.975660000 | 261.493750000 | 344.221540000 |
| H  | 33.893680000 | 272.587130000 | 341.290820000 | N | 32.089276000 | 264.284719000 | 343.267260000 |
| C  | 33.179000000 | 272.187010000 | 342.010011000 | C | 31.032000000 | 265.273990000 | 343.182010000 |
| H  | 33.591770000 | 271.381890000 | 342.617880000 | H | 31.119580000 | 265.798180000 | 342.334930000 |

|   |              |               |               |   |              |               |               |
|---|--------------|---------------|---------------|---|--------------|---------------|---------------|
| C | 30.848444000 | 266.122579000 | 344.455722000 | O | 30.359330000 | 270.635059000 | 353.861461000 |
| C | 30.021652000 | 265.519300000 | 345.612158000 | H | 29.133410000 | 269.629740000 | 356.043600000 |
| O | 30.088287000 | 266.061327000 | 346.755353000 | H | 28.008849000 | 267.555490000 | 355.644117000 |
| O | 29.218558000 | 264.560644000 | 345.310255000 | N | 29.581691000 | 268.632498000 | 353.057690000 |
| H | 21.787260000 | 271.372980000 | 347.553610000 | C | 30.253799000 | 268.660462000 | 351.763014000 |
| C | 22.609000000 | 271.709020000 | 348.186010000 | C | 29.524852000 | 267.677779000 | 350.835309000 |
| C | 22.925828000 | 273.177048000 | 348.114366000 | O | 29.616345000 | 267.775811000 | 349.596261000 |
| O | 23.530684000 | 273.743068000 | 349.036862000 | C | 31.749585000 | 268.301547000 | 351.853336000 |
| C | 23.860027000 | 270.818351000 | 347.918025000 | O | 28.869022000 | 266.763726000 | 351.494916000 |
| C | 23.421484000 | 269.342412000 | 347.800073000 | H | 32.223523000 | 268.371883000 | 350.857603000 |
| C | 24.497919000 | 268.282759000 | 348.013325000 | H | 28.887868000 | 267.890306000 | 353.183067000 |
| O | 25.597225000 | 268.286734000 | 347.392448000 | H | 30.148169000 | 269.671166000 | 351.324382000 |
| O | 24.144144000 | 267.353348000 | 348.847467000 | H | 31.877709000 | 267.281907000 | 352.258605000 |
| H | 22.993945000 | 269.159283000 | 346.793550000 | H | 32.256885000 | 269.013050000 | 352.525625000 |
| H | 24.586347000 | 270.938394000 | 348.742721000 | H | 30.864030000 | 260.791230000 | 354.757570000 |
| H | 22.619383000 | 269.129876000 | 348.527420000 | C | 31.178000000 | 261.334020000 | 353.866000000 |
| H | 24.368134000 | 271.141132000 | 346.990657000 | H | 32.129410000 | 261.846910000 | 354.006980000 |
| H | 19.443840000 | 261.850980000 | 348.348240000 | C | 30.202628000 | 262.397156000 | 353.317497000 |
| C | 20.347000000 | 261.696010000 | 347.758000000 | C | 29.016592000 | 261.843628000 | 352.500580000 |
| C | 21.354646000 | 260.916567000 | 348.571084000 | C | 28.432589000 | 262.879720000 | 351.556113000 |
| O | 21.606422000 | 261.171559000 | 349.769673000 | O | 28.237786000 | 264.069379000 | 352.005559000 |
| C | 20.957649000 | 262.992662000 | 347.164308000 | O | 28.166880000 | 262.503455000 | 350.365324000 |
| C | 21.823396000 | 263.744177000 | 348.116965000 | H | 28.198544000 | 261.491193000 | 353.160485000 |
| C | 23.172197000 | 264.053310000 | 348.087418000 | H | 30.782738000 | 263.062401000 | 352.647177000 |
| N | 21.358869000 | 264.247479000 | 349.323648000 | H | 29.312226000 | 260.978224000 | 351.881716000 |
| C | 22.378077000 | 264.832881000 | 349.987524000 | H | 29.828569000 | 263.052153000 | 354.125763000 |
| N | 23.493671000 | 264.733475000 | 349.253065000 | H | 36.466940000 | 262.009610000 | 352.392230000 |
| H | 20.142360000 | 263.639826000 | 346.788994000 | C | 37.013000000 | 262.588010000 | 351.647000000 |
| H | 23.918692000 | 263.855178000 | 347.315510000 | H | 37.736650000 | 263.287660000 | 352.065240000 |
| H | 22.301387000 | 265.333281000 | 350.952373000 | C | 35.965260000 | 263.322576000 | 350.777635000 |
| H | 21.582190000 | 262.732318000 | 346.291744000 | C | 34.981112000 | 264.152805000 | 351.624301000 |
| N | 21.996645000 | 259.953805000 | 347.870024000 | C | 33.896625000 | 264.899820000 | 350.836395000 |
| C | 23.071000000 | 259.170010000 | 348.449000000 | N | 32.918865000 | 263.977953000 | 350.235151000 |
| H | 22.721090000 | 258.770010000 | 349.400660000 | C | 31.994534000 | 264.332879000 | 349.316613000 |
| C | 24.361127000 | 259.994885000 | 348.647721000 | N | 31.818521000 | 265.631836000 | 349.008196000 |
| C | 24.945298000 | 260.522962000 | 347.333954000 | N | 31.295721000 | 263.403698000 | 348.650136000 |
| C | 25.950571000 | 261.645932000 | 347.475180000 | H | 37.585475000 | 261.871227000 | 351.029685000 |
| O | 26.190582000 | 262.162545000 | 348.617448000 | H | 35.401928000 | 262.577322000 | 350.180563000 |
| O | 26.490810000 | 262.035236000 | 346.383265000 | H | 36.463256000 | 263.987046000 | 350.043638000 |
| H | 24.158760000 | 260.931894000 | 346.666889000 | N | 22.525886000 | 273.869620000 | 347.002597000 |
| H | 21.745125000 | 259.803844000 | 346.895425000 | C | 22.951000000 | 275.252010000 | 346.817990000 |
| H | 25.114863000 | 259.380371000 | 349.173469000 | C | 24.196443000 | 275.361361000 | 345.893297000 |
| H | 25.451185000 | 259.728372000 | 346.751671000 | C | 25.326071000 | 274.492624000 | 346.353262000 |
| H | 24.130125000 | 260.846523000 | 349.307269000 | C | 25.775342000 | 273.295068000 | 345.816764000 |
| H | 25.458790000 | 259.267550000 | 354.767240000 | N | 26.077075000 | 274.779366000 | 347.486654000 |
| C | 25.515000000 | 259.965000000 | 355.603000000 | C | 26.958090000 | 273.793185000 | 347.628082000 |
| H | 25.321020000 | 259.480770000 | 356.560070000 | N | 26.803393000 | 272.872424000 | 346.639036000 |
| C | 24.575037000 | 261.173962000 | 355.347683000 | H | 22.280004000 | 273.326410000 | 346.173485000 |
| C | 24.647274000 | 261.744425000 | 353.953013000 | H | 27.404186000 | 272.062301000 | 346.426590000 |
| C | 25.488535000 | 262.662461000 | 353.338522000 | H | 23.238054000 | 275.615925000 | 347.823921000 |
| N | 23.744953000 | 261.374058000 | 352.956609000 | H | 24.502010000 | 276.422058000 | 345.875079000 |
| C | 24.004433000 | 262.025132000 | 351.805869000 | H | 25.455107000 | 272.722870000 | 344.944850000 |
| N | 25.069080000 | 262.808388000 | 352.022640000 | H | 27.709773000 | 273.711916000 | 348.415335000 |
| H | 25.519839000 | 263.435646000 | 351.277714000 | H | 23.908556000 | 275.076098000 | 344.864766000 |
| H | 26.562822000 | 260.319543000 | 355.630077000 | H | 30.262080000 | 267.023782000 | 344.188539000 |
| H | 26.334618000 | 263.232475000 | 353.724083000 | H | 31.805509000 | 266.482825000 | 344.874391000 |
| H | 23.415792000 | 261.928470000 | 350.888048000 | O | 27.556538000 | 266.090200000 | 343.264035000 |
| H | 24.999320000 | 267.480390000 | 355.837610000 | H | 26.716496000 | 266.565117000 | 343.019279000 |
| C | 25.565000000 | 267.226990000 | 354.941010000 | H | 27.246730000 | 265.240151000 | 343.716012000 |
| C | 26.443311000 | 268.431104000 | 354.618239000 | O | 26.527110000 | 260.491296000 | 343.866213000 |
| O | 26.014376000 | 269.410525000 | 353.992780000 | H | 27.238085000 | 261.162112000 | 344.012126000 |
| C | 24.590061000 | 266.887516000 | 353.818473000 | H | 26.748930000 | 259.830574000 | 344.591559000 |
| C | 25.209880000 | 266.364247000 | 352.531903000 | O | 24.603347000 | 262.318154000 | 344.296325000 |
| O | 26.459569000 | 266.071624000 | 352.510191000 | H | 24.248858000 | 262.428904000 | 343.393652000 |
| O | 24.414211000 | 266.234431000 | 351.545570000 | H | 25.250621000 | 261.542242000 | 344.201575000 |
| N | 27.723980000 | 268.376135000 | 355.112341000 | O | 30.066561000 | 260.768961000 | 348.545667000 |
| C | 28.598000000 | 269.534000000 | 355.099000000 | O | 28.413719000 | 269.398662000 | 347.741361000 |
| C | 29.609862000 | 269.647463000 | 353.947553000 | H | 28.435779000 | 269.865100000 | 346.856264000 |

|   |              |               |               |   |              |               |               |
|---|--------------|---------------|---------------|---|--------------|---------------|---------------|
| H | 29.233605000 | 269.647923000 | 348.210948000 | N | 22.363028000 | 280.233762000 | 346.635330000 |
| O | 27.878948000 | 267.554227000 | 345.380774000 | C | 21.223999000 | 281.008999000 | 346.209990000 |
| H | 27.822875000 | 266.938924000 | 344.556033000 | C | 20.483690000 | 281.662825000 | 347.376335000 |
| H | 27.247934000 | 268.272381000 | 345.152787000 | O | 20.546956000 | 281.256083000 | 348.554315000 |
| O | 25.710960000 | 269.540699000 | 345.044161000 | N | 19.709001000 | 282.719764000 | 347.028733000 |
| H | 26.441334000 | 270.197661000 | 345.109786000 | C | 19.011000000 | 283.493010000 | 348.032991000 |
| H | 25.621677000 | 269.161612000 | 345.974460000 | C | 18.034148000 | 282.633071000 | 348.843374000 |
| O | 26.624785000 | 269.604285000 | 350.077007000 | O | 17.173633000 | 281.933371000 | 348.281582000 |
| H | 26.574075000 | 268.619664000 | 350.171751000 | H | 18.434830000 | 284.191610000 | 347.608730000 |
| H | 27.050481000 | 269.703964000 | 349.197422000 | N | 18.127038000 | 282.768133000 | 350.188040000 |
| O | 26.740919000 | 264.019428000 | 344.692561000 | C | 17.337001000 | 281.957000000 | 351.103004000 |
| H | 25.907542000 | 263.466902000 | 344.573827000 | H | 16.641987000 | 282.518131000 | 351.552545000 |
| O | 28.644939000 | 262.005619000 | 344.992119000 | C | 18.238001000 | 281.334020000 | 352.162991000 |
| H | 29.429732000 | 262.279970000 | 344.429974000 | C | 17.648669000 | 280.180880000 | 352.929636000 |
| H | 28.862178000 | 261.076632000 | 345.500445000 | N | 16.362821000 | 279.894547000 | 352.856616000 |
| O | 27.875004000 | 259.644713000 | 349.915503000 | O | 18.345747000 | 279.461229000 | 353.753275000 |
| H | 25.456098000 | 268.436974000 | 343.662906000 | O | 18.188400000 | 278.724838000 | 350.436089000 |
| H | 25.283855000 | 268.252759000 | 342.125842000 | H | 22.031620000 | 283.602460000 | 355.441470000 |
| O | 25.342775000 | 267.744794000 | 342.956289000 | C | 21.583000000 | 282.946990000 | 356.049010000 |
| H | 27.389683000 | 260.488752000 | 349.997586000 | C | 22.412037000 | 281.701138000 | 356.221595000 |
| H | 28.718981000 | 259.959883000 | 349.490365000 | O | 22.544573000 | 280.835917000 | 355.319089000 |
| H | 31.770639000 | 269.509997000 | 342.993353000 | H | 20.684750000 | 282.662970000 | 355.713620000 |
| H | 28.014219000 | 272.764579000 | 343.781166000 | N | 23.017816000 | 281.561400000 | 357.417783000 |
| H | 25.880098000 | 276.189070000 | 348.122640000 | C | 23.874000000 | 280.441010000 | 357.715000000 |
| H | 33.014791000 | 261.352359000 | 342.455528000 | C | 23.188345000 | 279.080430000 | 357.540960000 |
| H | 33.057669000 | 264.597657000 | 343.221183000 | O | 21.988832000 | 278.893447000 | 357.784652000 |
| H | 30.095718000 | 264.697958000 | 343.058115000 | N | 24.063298000 | 278.093769000 | 357.203806000 |
| H | 22.279668000 | 271.522174000 | 349.225678000 | C | 23.678000000 | 276.709990000 | 357.126010000 |
| H | 20.002894000 | 261.082961000 | 346.903631000 | C | 23.398733000 | 276.220907000 | 355.700402000 |
| H | 23.258869000 | 258.314054000 | 347.777901000 | O | 23.610657000 | 276.914842000 | 354.689715000 |
| H | 26.186753000 | 266.348800000 | 355.193169000 | N | 22.944979000 | 274.943455000 | 355.654305000 |
| H | 23.862629000 | 266.123976000 | 354.153763000 | C | 22.540000000 | 274.355990000 | 354.399990000 |
| H | 23.997127000 | 267.477478000 | 353.539542000 | C | 21.399961000 | 275.161370000 | 353.743569000 |
| H | 27.964288000 | 270.435918000 | 355.005199000 | O | 20.694089000 | 275.980414000 | 354.353222000 |
| H | 31.365769000 | 260.568416000 | 353.087102000 | H | 22.252660000 | 273.406850000 | 354.528710000 |
| H | 32.973534000 | 262.991477000 | 350.481977000 | N | 21.224068000 | 274.816378000 | 352.433078000 |
| H | 30.008319000 | 260.304702000 | 347.662122000 | C | 20.285000000 | 275.553011000 | 351.592011000 |
| H | 29.469365000 | 261.544297000 | 348.333922000 | C | 18.829329000 | 275.420759000 | 351.984100000 |
| H | 24.800745000 | 261.985016000 | 356.063258000 | O | 17.966182000 | 276.203863000 | 351.521728000 |
| H | 23.524825000 | 260.881702000 | 355.535717000 | C | 20.509099000 | 275.195092000 | 350.112945000 |
| H | 33.372023000 | 265.598864000 | 351.518095000 | O | 22.068319000 | 277.354365000 | 346.007970000 |
| H | 34.359815000 | 265.501569000 | 350.029563000 | O | 20.740657000 | 278.684383000 | 349.532889000 |
| H | 35.541977000 | 264.912785000 | 352.201193000 | O | 22.483327000 | 277.941135000 | 352.145111000 |
| H | 34.493618000 | 263.503395000 | 352.380899000 | O | 20.827937000 | 279.275729000 | 354.039593000 |
| H | 28.958341000 | 258.090723000 | 348.233117000 | H | 20.496826000 | 274.661719000 | 346.584007000 |
| H | 28.399913000 | 256.826236000 | 347.120928000 | H | 18.708451000 | 275.595530000 | 345.409515000 |
| H | 31.120272000 | 265.877184000 | 348.291928000 | H | 19.609605000 | 277.335959000 | 347.677950000 |
| H | 32.080528000 | 266.358924000 | 349.666150000 | H | 18.003660000 | 276.664656000 | 347.381777000 |
| H | 30.382037000 | 263.633888000 | 348.221679000 | H | 17.628073000 | 280.297569000 | 347.405004000 |
| H | 31.401490000 | 262.400848000 | 348.837636000 | H | 17.869723000 | 278.961201000 | 348.494669000 |
| H | 20.413197000 | 264.133693000 | 349.685989000 | H | 24.854296000 | 279.283706000 | 346.798146000 |
| H | 22.977842000 | 260.711208000 | 353.075485000 | H | 22.982945000 | 278.274494000 | 348.203283000 |
| C | 21.835105000 | 276.165925000 | 346.309116000 | H | 23.530476000 | 279.249082000 | 349.573477000 |
| N | 20.619733000 | 275.591918000 | 346.185619000 | H | 23.817701000 | 277.378749000 | 350.711659000 |
| C | 19.446000000 | 276.340000000 | 345.755000000 | H | 22.884161000 | 277.400696000 | 352.866511000 |
| H | 19.680950000 | 276.898580000 | 344.959520000 | H | 22.331343000 | 279.218864000 | 346.480213000 |
| C | 18.841999000 | 277.191010000 | 346.890020000 | H | 20.512481000 | 280.334654000 | 345.697209000 |
| C | 18.393390000 | 278.600064000 | 346.501744000 | H | 21.525197000 | 281.792998000 | 345.488308000 |
| N | 17.846813000 | 279.301782000 | 347.519689000 | H | 19.704650000 | 283.045293000 | 346.064062000 |
| O | 18.542318000 | 279.063932000 | 345.350667000 | H | 19.739870000 | 283.989518000 | 348.702588000 |
| H | 25.275690000 | 280.167700000 | 348.188080000 | H | 18.901366000 | 283.313884000 | 350.563298000 |
| C | 24.482000000 | 279.798000000 | 347.704990000 | H | 16.861698000 | 281.172705000 | 350.487083000 |
| C | 23.426479000 | 280.805607000 | 347.278203000 | H | 18.563223000 | 282.084421000 | 352.911375000 |
| O | 23.497872000 | 282.030725000 | 347.483110000 | H | 19.155330000 | 280.935905000 | 351.688731000 |
| C | 23.880639000 | 278.739572000 | 348.656565000 | H | 15.737927000 | 280.376953000 | 352.214731000 |
| C | 24.741067000 | 277.559421000 | 349.066551000 | H | 15.993066000 | 279.088204000 | 353.361889000 |
| N | 24.554436000 | 276.903050000 | 350.167235000 | H | 19.405185000 | 279.556530000 | 353.798616000 |
| O | 25.632300000 | 277.213544000 | 348.132676000 | H | 18.095893000 | 277.807089000 | 350.810967000 |

|   |              |               |               |
|---|--------------|---------------|---------------|
| H | 21.428971000 | 283.454159000 | 357.017636000 |
| H | 22.875829000 | 282.272756000 | 358.130880000 |
| H | 24.186741000 | 280.518300000 | 358.770759000 |
| H | 24.789906000 | 280.486090000 | 357.094079000 |
| H | 24.995157000 | 278.349287000 | 356.882836000 |
| H | 24.474133000 | 276.077945000 | 357.562999000 |
| H | 22.767785000 | 276.573187000 | 357.737794000 |
| H | 22.664119000 | 274.490422000 | 356.522007000 |
| H | 23.390299000 | 274.354756000 | 353.690016000 |
| H | 22.105679000 | 274.512876000 | 351.965502000 |
| H | 21.550559000 | 275.424105000 | 349.823300000 |
| H | 20.321631000 | 274.121944000 | 349.926348000 |
| H | 19.834378000 | 275.795782000 | 349.482373000 |
| H | 20.882995000 | 279.591641000 | 349.143159000 |
| H | 19.155641000 | 278.749656000 | 350.183567000 |
| H | 21.921820000 | 278.574303000 | 352.650199000 |
| H | 21.460860000 | 278.532313000 | 350.177698000 |
| H | 20.868948000 | 278.425876000 | 354.534241000 |
| H | 21.425101000 | 279.926754000 | 354.545056000 |
| N | 18.537773000 | 274.415119000 | 352.818611000 |
| C | 17.201000000 | 274.185000000 | 353.303010000 |
| H | 17.041754000 | 274.523807000 | 354.230291000 |
| H | 17.005139000 | 273.205040000 | 353.266725000 |
| H | 20.504655000 | 276.635584000 | 351.707645000 |
| H | 19.304406000 | 273.823923000 | 353.136340000 |
| H | 16.500103000 | 274.701930000 | 352.626934000 |
| O | 23.951498000 | 274.488469000 | 351.520857000 |
| H | 23.845425000 | 273.913420000 | 350.722778000 |
| H | 24.279064000 | 275.326500000 | 351.074911000 |
